# Supplementary material
Source: publisher figshare collection journal article supplement (https://acs.figshare.com/ndownloader/files/13101344)
Supplement: Supplementary file 1 [file 13101344]

Compound	SMILES	MDA-MB-231 GI50 (nM)	A549 GI50 (nM)	PANC-1 GI50 (nM)
1	CN(C)[C@@H](C(C)C)C(O[C@H](C(C)C)C(N(C)[C@@H](COC)C(N(C)[C@@H](CC(C)C)C(N(C)[C@]([C@@H](C)OC1=O)([H])C(N(C)[C@@H](COC)C(N(C)[C@@](C(N[C@@H](C)C(N(C)[C@@H](CC(C)C)C(N[C@@H](CC2=CC=C(OC)C=C2)C(N(C)[C@@H]1C)=O)=O)=O)=O)([H])[C@@H](C)CC)=O)=O)=O)=O)=O)=O	5.0¡À2.5	5.4¡À0.9	3.1
1a	CN(C)[C@@H](C(C)C)C(O[C@@H](C(C)C)C(N(C)[C@@H](COC)C(N(C)[C@@H](CC(C)C)C(N(C)[C@]([C@@H](C)OC1=O)([H])C(N(C)[C@@H](COC)C(N(C)[C@@](C(N[C@@H](C)C(N(C)[C@@H](CC(C)C)C(N[C@@H](CC2=CC=C(OC)C=C2)C(N(C)[C@H]1C)=O)=O)=O)=O)([H])[C@@H](C)CC)=O)=O)=O)=O)=O)=O	>16000	22800
1b	CN(C)[C@@H](C(C)C)C(O[C@@H](C(C)C)C(N(C)[C@@H](COC)C(N(C)[C@@H](CC(C)C)C(N(C)[C@]([C@@H](C)OC1=O)([H])C(N(C)[C@@H](COC)C(N(C)[C@@](C(N[C@@H](C)C(N(C)[C@@H](CC(C)C)C(N[C@@H](CC2=CC=C(OC)C=C2)C(N(C)[C@@H]1C)=O)=O)=O)=O)([H])[C@@H](C)CC)=O)=O)=O)=O)=O)=O	545	19
1c	CN(C)[C@@H](C(C)C)C(O[C@H](C(C)C)C(N(C)[C@@H](COC)C(N(C)[C@@H](CC(C)C)C(N(C)[C@]([C@@H](C)OC1=O)([H])C(N(C)[C@@H](COC)C(N(C)[C@@](C(N[C@@H](C)C(N(C)[C@@H](CC(C)C)C(N[C@@H](CC2=CC=C(OC)C=C2)C(N(C)[C@H]1C)=O)=O)=O)=O)([H])[C@@H](C)CC)=O)=O)=O)=O)=O)=O	7518.2¡À244.7	20090.9	12416.5
1d	CN(C)[C@@H](C(C)C)C(O[C@@H](C(C)C)C(N(C)[C@@H](COC)C(N(C)[C@@H](CC(C)C)C(N(C)[C@@]([C@@H](C)OC1=O)([H])C(N(C)[C@@H](COC)C(N(C)[C@@](C(N[C@@H](C)C(N(C)[C@@H](CC(C)C)C(N[C@@H](CC2=CC=C(OC)C=C2)C(N(C)[C@@H]1C)=O)=O)=O)=O)([H])[C@@H](C)CC)=O)=O)=O)=O)=O)=O	10808.8¡À545.3
1e	CN(C)[C@@H](C(C)C)C(O[C@@H](C(C)C)C(N(C)[C@H](COC)C(N(C)[C@@H](CC(C)C)C(N(C)[C@]([C@@H](C)OC1=O)([H])C(N(C)[C@@H](COC)C(N(C)[C@@](C(N[C@@H](C)C(N(C)[C@@H](CC(C)C)C(N[C@@H](CC2=CC=C(OC)C=C2)C(N(C)[C@@H]1C)=O)=O)=O)=O)([H])[C@@H](C)CC)=O)=O)=O)=O)=O)=O	2661.9¡À212.1	1995.3	1905.5
1f	CN(C)[C@@H](C(C)C)C(O[C@H](C(C)C)C(N(C)[C@@H](C)C(N(C)[C@@H](CC(C)C)C(N(C)[C@]([C@@H](C)OC1=O)([H])C(N(C)[C@@H](C)C(N(C)[C@@](C(N[C@@H](C)C(N(C)[C@@H](CC(C)C)C(N[C@@H](CC2=CC=C(OC)C=C2)C(N(C)[C@@H]1C)=O)=O)=O)=O)([H])[C@@H](C)CC)=O)=O)=O)=O)=O)=O	5.1¡À2.2	7.3¡À3.8	7
1g	CN(C)[C@@H](C(C)C)C(O[C@H](C(C)C)C(N(C)[C@@H](COC(C)(C)C)C(N(C)[C@@H](CC(C)C)C(N(C)[C@]([C@@H](C)OC1=O)([H])C(N(C)[C@@H](C)C(N(C)[C@@](C(N[C@@H](C)C(N(C)[C@@H](CC(C)C)C(N[C@@H](CC2=CC=C(OC)C=C2)C(N(C)[C@@H]1C)=O)=O)=O)=O)([H])[C@@H](C)CC)=O)=O)=O)=O)=O)=O	5.3¡À3.0	12.4¡À2.1	32.9
1h	CN(C)[C@@H](C(C)C)C(O[C@H](C(C)C)C(N(C)[C@@H](CCCCNC(OC(C)(C)C)=O)C(N(C)[C@@H](CC(C)C)C(N(C)[C@]([C@@H](C)OC1=O)([H])C(N(C)[C@@H](C)C(N(C)[C@@](C(N[C@@H](C)C(N(C)[C@@H](CC(C)C)C(N[C@@H](CC2=CC=C(OC)C=C2)C(N(C)[C@@H]1C)=O)=O)=O)=O)([H])[C@@H](C)CC)=O)=O)=O)=O)=O)=O	61.6¡À0.9	81.7¡À5.6	123.9
1i	CN(C)[C@@H](C(C)C)C(O[C@H](C(C)C)C(N(C)[C@@H](CO)C(N(C)[C@@H](CC(C)C)C(N(C)[C@]([C@@H](C)OC1=O)([H])C(N(C)[C@@H](COC(C)(C)C)C(N(C)[C@@](C(N[C@@H](C)C(N(C)[C@@H](CC(C)C)C(N[C@@H](CC2=CC=C(OC)C=C2)C(N(C)[C@@H]1C)=O)=O)=O)=O)([H])[C@@H](C)CC)=O)=O)=O)=O)=O)=O	20.8¡À5.7	193.5¡À54.7	46.3
1j	CN(C)[C@@H](C(C)C)C(O[C@H](C(C)C)C(N(C)[C@@H](CO)C(N(C)[C@@H](CC(C)C)C(N(C)[C@]([C@@H](C)OC1=O)([H])C(N(C)[C@@H](CO)C(N(C)[C@@](C(N[C@@H](C)C(N(C)[C@@H](CC(C)C)C(N[C@@H](CC2=CC=C(OC)C=C2)C(N(C)[C@@H]1C)=O)=O)=O)=O)([H])[C@@H](C)CC)=O)=O)=O)=O)=O)=O	2056.3¡À150.5		2177.7
1k	CN(C)[C@@H](C(C)C)C(O[C@H](C(C)C)C(N(C)[C@@H](COC)C(N(C)[C@@H](CC(C)C)C(N(C)[C@]([C@@H](C)OC1=O)([H])C(N(C)[C@@H](COC)C(N(C)[C@@](C(N[C@@H](C)C(N(C)[C@@H](CC(C)C)C(N[C@@H](CC2=CC=C(O)C=C2)C(N(C)[C@@H]1C)=O)=O)=O)=O)([H])[C@@H](C)CC)=O)=O)=O)=O)=O)=O	183.4¡À12.5	222.0¡À57.2	277.4
1l	CN(C)[C@@H](C(C)C)C(N[C@H](C(C)C)C(N(C)[C@@H](COC)C(N(C)[C@@H](CC(C)C)C(N(C)[C@]([C@@H](C)OC1=O)([H])C(N(C)[C@@H](COC)C(N(C)[C@@](C(N[C@@H](C)C(N(C)[C@@H](CC(C)C)C(N[C@@H](CC2=CC=C(OC)C=C2)C(N(C)[C@@H]1C)=O)=O)=O)=O)([H])[C@@H](C)CC)=O)=O)=O)=O)=O)=O	449.7¡À61.9	472.7¡À65.2	600.6
1m	CN(C)[C@@H](C(C)C)C(N(C)[C@H](C(C)C)C(N(C)[C@@H](C)C(N(C)[C@@H](CC(C)C)C(N(C)[C@]([C@@H](C)OC1=O)([H])C(N(C)[C@@H](C)C(N(C)[C@@](C(N[C@@H](C)C(N(C)[C@@H](CC(C)C)C(N[C@@H](CC2=CC=C(OC)C=C2)C(N(C)[C@@H]1C)=O)=O)=O)=O)([H])[C@@H](C)CC)=O)=O)=O)=O)=O)=O	414.6¡À75.8	510.8¡À40.3	722.8
1n	CN[C@@H](CC(C)C)C(N(C)[C@]([C@@H](C)OC1=O)([H])C(N(C)[C@@H](C)C(N(C)[C@@](C(N[C@@H](C)C(N(C)[C@@H](CC(C)C)C(N[C@@H](CC2=CC=C(OC)C=C2)C(N(C)[C@@H]1C)=O)=O)=O)=O)([H])[C@@H](C)CC)=O)=O)=O	>16000
1o	CN(C(CCCCCCCCC)=O)[C@@H](CC(C)C)C(N(C)[C@]([C@@H](C)OC1=O)([H])C(N(C)[C@@H](C)C(N(C)[C@@](C(N[C@@H](C)C(N(C)[C@@H](CC(C)C)C(N[C@@H](CC2=CC=C(OC)C=C2)C(N(C)[C@@H]1C)=O)=O)=O)=O)([H])[C@@H](C)CC)=O)=O)=O	470.0¡À108.6	732.6¡À125.0	827.9
1p	CN[C@@H](C(C)C)C(O[C@H](C(C)C)C(N(C)[C@@H](C)C(N(C)[C@@H](CC(C)C)C(N(C)[C@]([C@@H](C)OC1=O)([H])C(N(C)[C@@H](C)C(N(C)[C@@](C(N[C@@H](C)C(N(C)[C@@H](CC(C)C)C(N[C@@H](CC2=CC=C(OC)C=C2)C(N(C)[C@@H]1C)=O)=O)=O)=O)([H])[C@@H](C)CC)=O)=O)=O)=O)=O)=O	236.5¡À29.2	359.5¡À15.8	204.4
1q	CN(C(CCNC(OC(C)(C)C)=O)=O)[C@@H](C(C)C)C(O[C@H](C(C)C)C(N(C)[C@@H](C)C(N(C)[C@@H](CC(C)C)C(N(C)[C@]([C@@H](C)OC1=O)([H])C(N(C)[C@@H](C)C(N(C)[C@@](C(N[C@@H](C)C(N(C)[C@@H](CC(C)C)C(N[C@@H](CC2=CC=C(OC)C=C2)C(N(C)[C@@H]1C)=O)=O)=O)=O)([H])[C@@H](C)CC)=O)=O)=O)=O)=O)=O	239.2¡À90.4	443.0¡À69.5	414.7
1r	CN(C(CCN)=O)[C@@H](C(C)C)C(O[C@H](C(C)C)C(N(C)[C@@H](C)C(N(C)[C@@H](CC(C)C)C(N(C)[C@]([C@@H](C)OC1=O)([H])C(N(C)[C@@H](C)C(N(C)[C@@](C(N[C@@H](C)C(N(C)[C@@H](CC(C)C)C(N[C@@H](CC2=CC=C(OC)C=C2)C(N(C)[C@@H]1C)=O)=O)=O)=O)([H])[C@@H](C)CC)=O)=O)=O)=O)=O)=O	>16000
